# Supplementary material for: Genipin suppresses colorectal cancer cells by inhibiting the Sonic Hedgehog pathway
Source: PubMed Central journal article supplement (PMC5731927; doi:10.18632/oncotarget.21882), 2017-10-16
Supplement: oncotarget-08-101952-s001.pdf [file oncotarget-08-101952-s001.pdf]

# Genipin suppresses colorectal cancer cells by inhibiting the Sonic Hedgehog pathway

## SUPPLEMENTARY MATERIALS

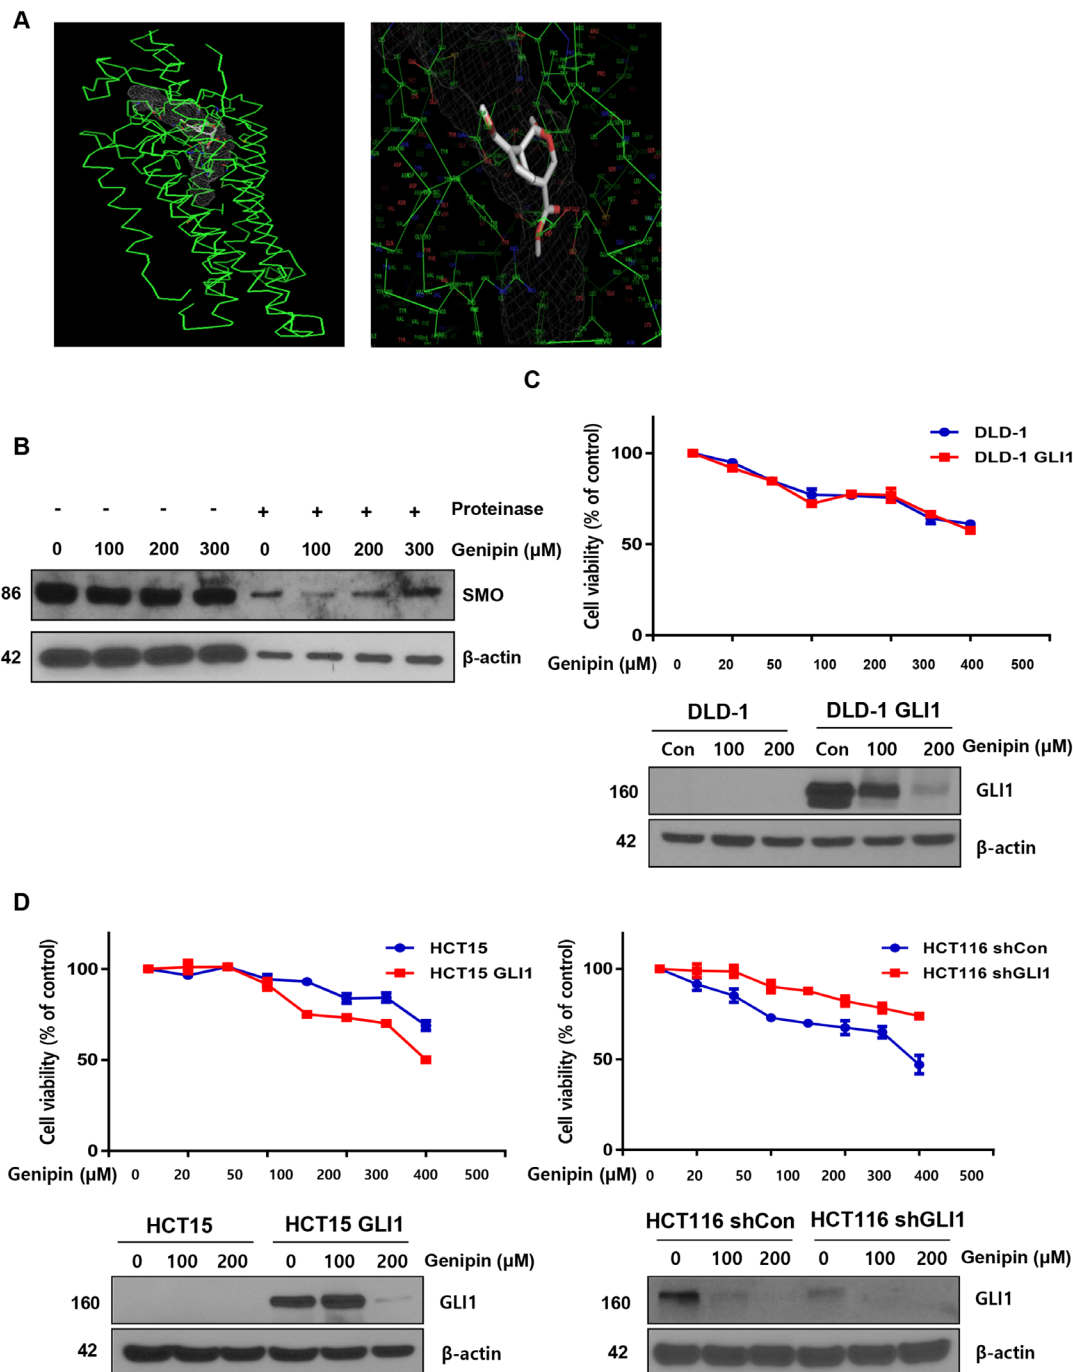

**Supplementary Figure 1:** (A) Binding of SMO and genipin. (B) Drug affinity responsive target stability (DARTS) detection by immunoblotting. SMO expression was measured, and  $\beta$ -actin was used as a loading control. (C, D) DLD-1 cells were transfected with HA-control or HA-GLI1 and the MTT assay was used to evaluate the effects of GLI1 expression on cell proliferation. Data are expressed as the means of three independent experiments.

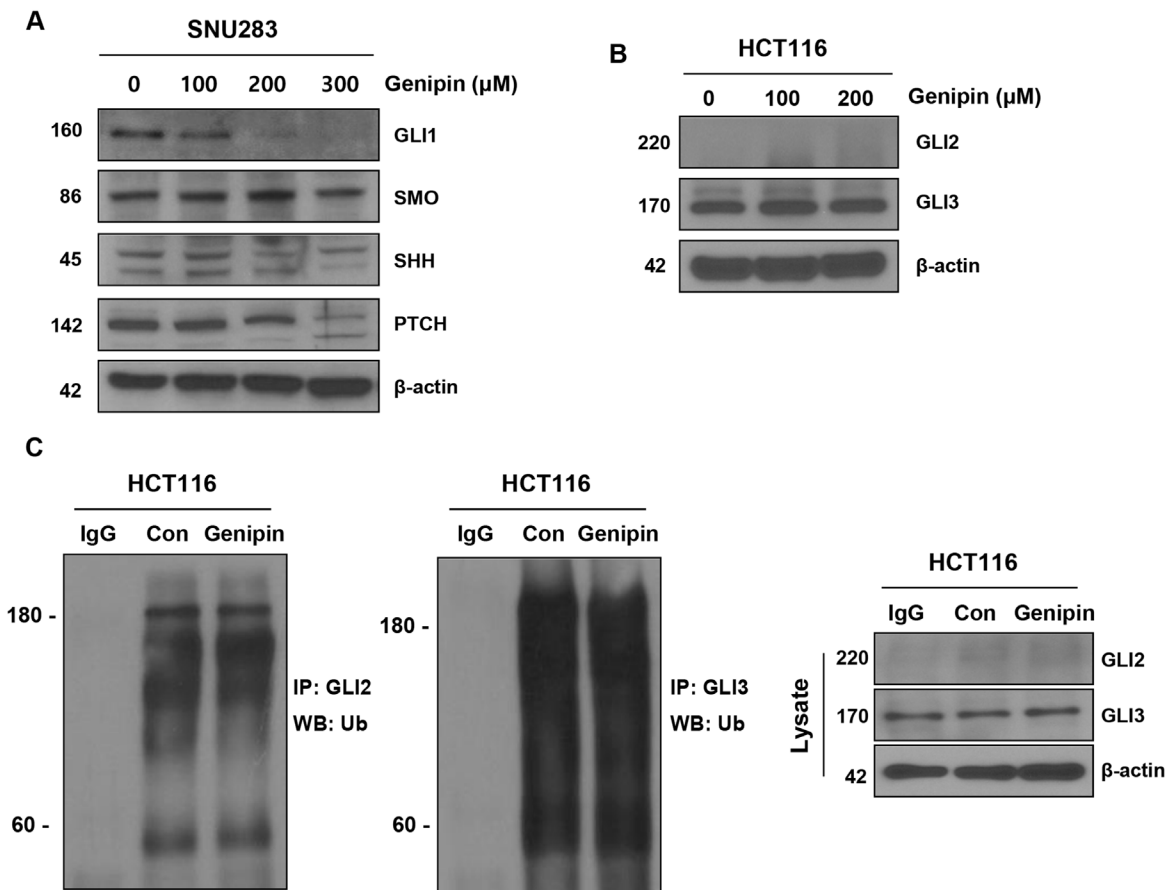

**Supplementary Figure 2:** (A) SNU283 cells were treated with genipin, and the expression levels of GLI1, SMO, SHH, and PTCH were measured by western blotting.  $\beta$ -Actin was used as a loading control. (B) The expression levels of GLI2 and GLI3 were measured by western blotting. (C) HCT116 cell lysates were immunoprecipitated with anti-GLI2 and anti-Gli-3 antibodies and then immunoblotted with an anti-ubiquitin antibody. Data are expressed as the means of three independent experiments.

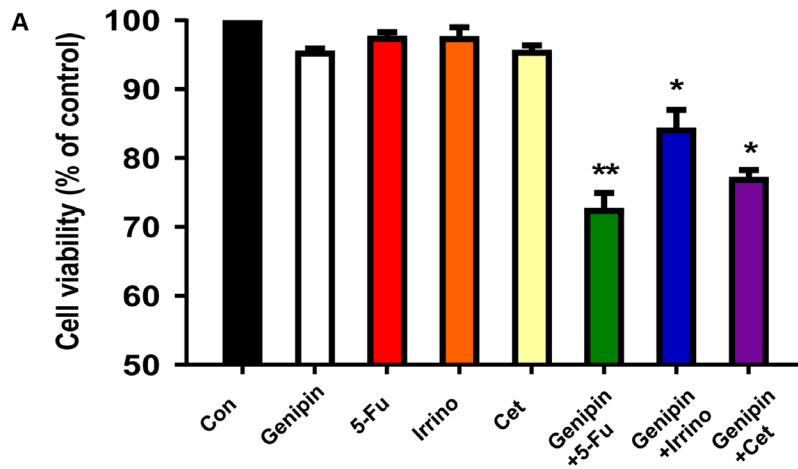

**Supplementary Figure 3:** (A) Susceptibility of CRCs to combined treatment with genipin and anti-cancer drugs (Cetuximab, irinotecan, and 5-FU). CRCs were treated with genipin (100  $\mu$ M) and Cetuximab (10  $\mu$ g/mL), irinotecan (10  $\mu$ M), and 5-FU (5  $\mu$ M). After 24 h of incubation, cell viability was determined by the MTT assay. Data are expressed as the means of three independent experiments.
